# Supplementary material for: Diversity and Evolution of Bacterial Twin Arginine Translocase Protein, TatC, Reveals a Protein Secretion System That Is Evolving to Fit Its Environmental Niche
Source: PubMed Central journal article supplement (PMC3827258; doi:10.1371/journal.pone.0078742), 2013-11-13

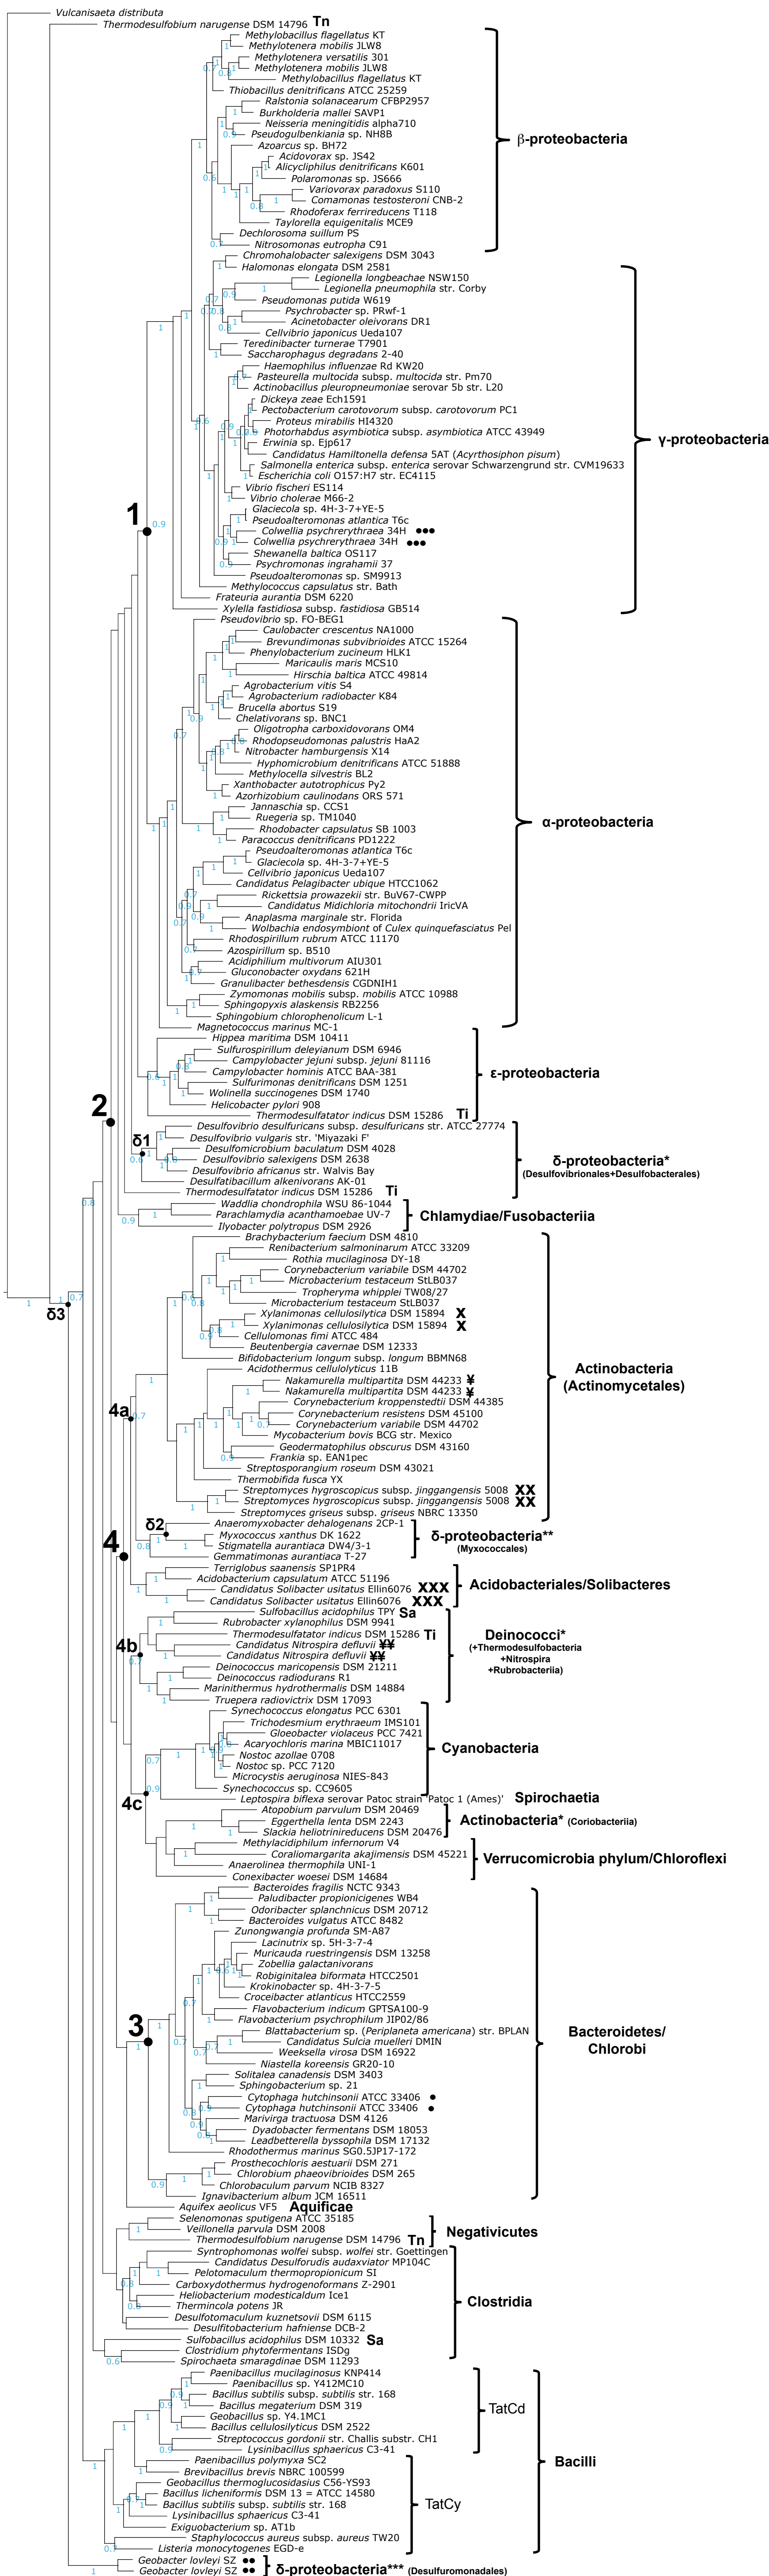

Supplement: pone.0078742.s002.pdf [file pone.0078742.s002.pdf]
